# Supplementary material for: Dendritic polyamide-amine modified phosphomolybdovanadic hybrid microspheres as a catalyst for methacrolein to methacrylic acid
Source: Royal Society of Chemistry journal article supplement (doi:10.1039/d2cy01784a), 2022-12-15
Supplement: d2cy01784a1.pdf [file d2cy01784a1.pdf]

## **Dendritic polyamide-amine modified phosphomolybdovanadic hybrid microsphere as catalyst for methacrolein to methacrylic acid**

Baohe Wang<sup>a, b</sup>, Yang Li<sup>a, b</sup>, Qianwen Zhu<sup>a, b</sup>, Jing Zhu<sup>a, b</sup>, Zhaobang Zhang<sup>a, b</sup>, Jing  
Ma<sup>a, b, \*</sup>

<sup>a</sup> Collaborative Innovation Center of Chemical Science and Engineering, Tianjin  
University, Tianjin 300072, China

<sup>b</sup> Key Laboratory for Green Chemical Technology of Ministry of Education, R&D  
Center for Petrochemical Technology, Tianjin University, Tianjin 300072, China

\*Corresponding author' s e-mail:

majing0027@tju.edu.cn

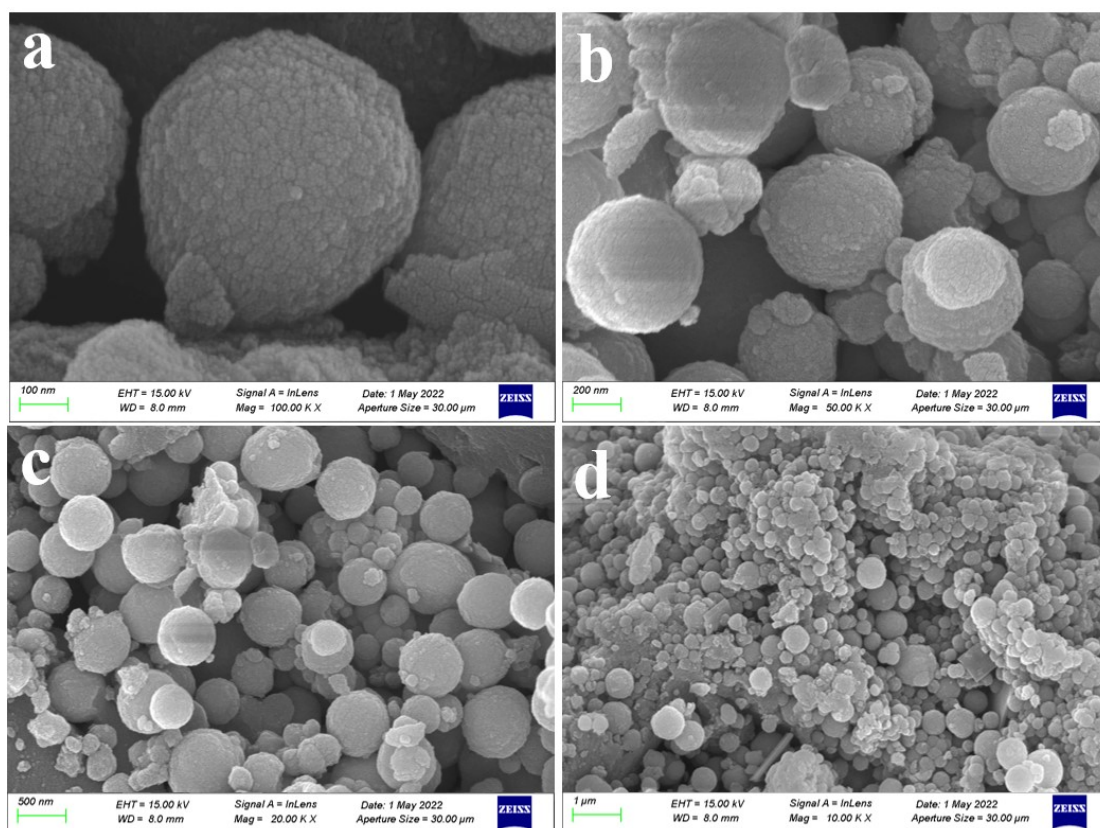

**Fig. S1.** SEM images of 100 nm, calcined PAMAM-CsPAV (a), 200 nm, calcined PAMAM-CsPAV (b), 500 nm, calcined PAMAM-CsPAV (c) and 1 μm, calcined PAMAM-CsPAV (d).

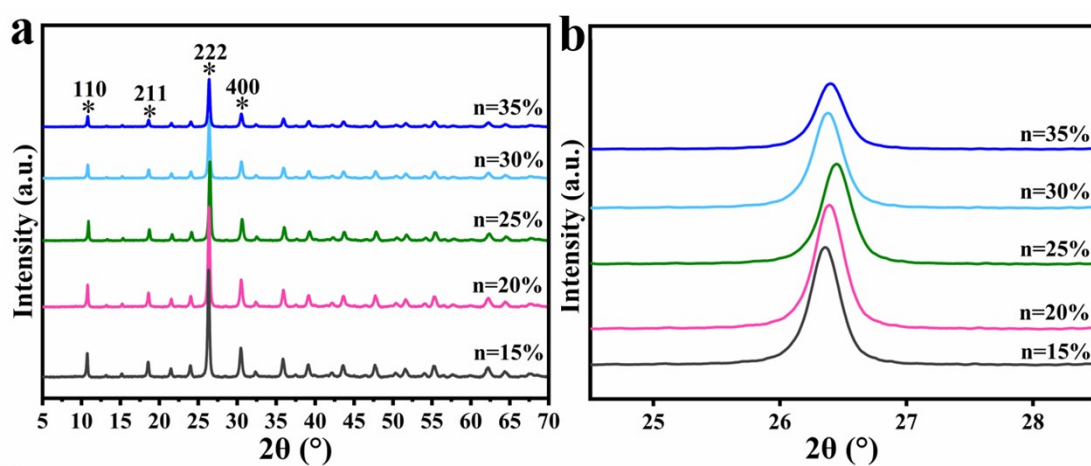

**Fig. S2.** The XRD and local patterns of calcined PAMAM<sub>n</sub>-CsPAV (n = 15-35%).

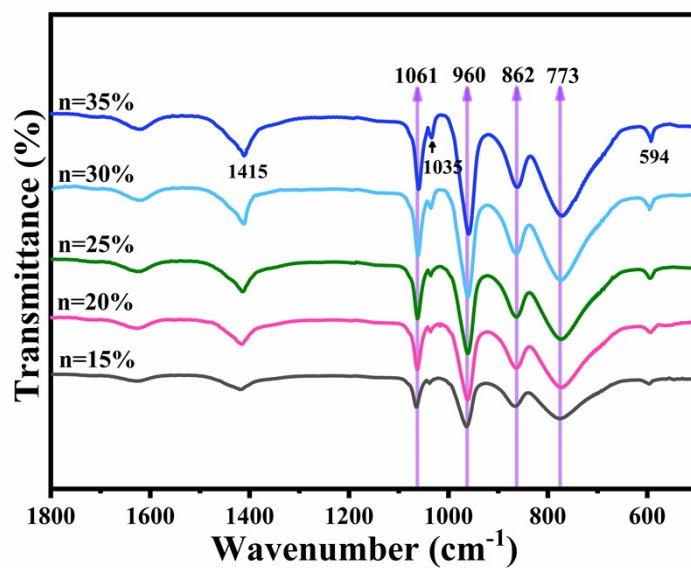

**Fig. S3.** FT-IR spectra of calcined PAMAM<sub>n</sub>-CsPAV (n = 15-35%).

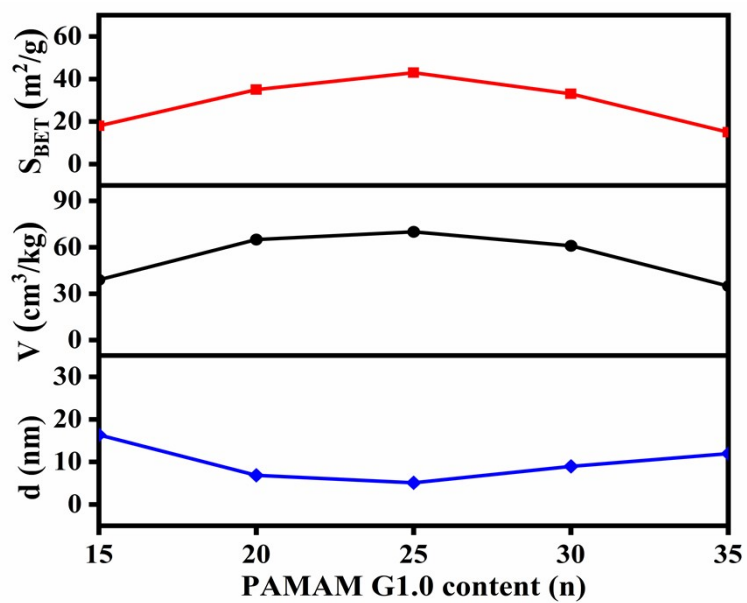

**Fig. S4.** Specific surface area, pore volume and pore diameter of calcined PAMAM<sub>n</sub>-CsPAV (n = 15-35%).

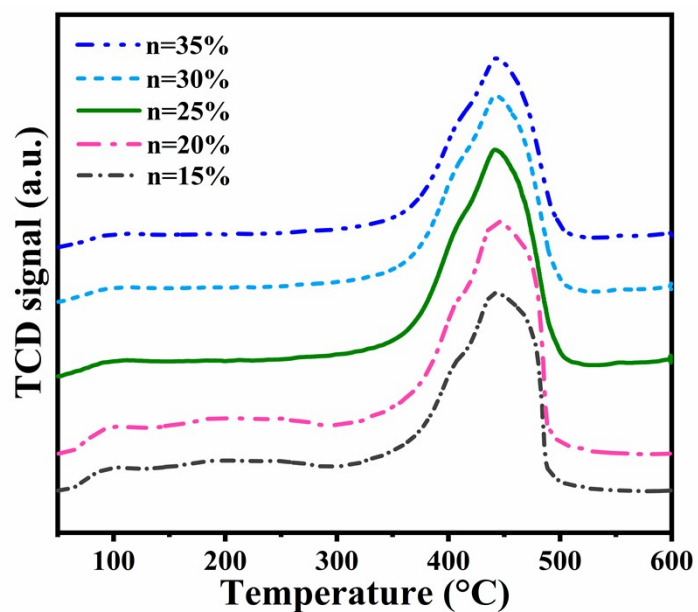

Fig. S5. The NH<sub>3</sub>-TPD curves of calcined PAMAM<sub>n</sub>-CsPAV (n = 15-35%).

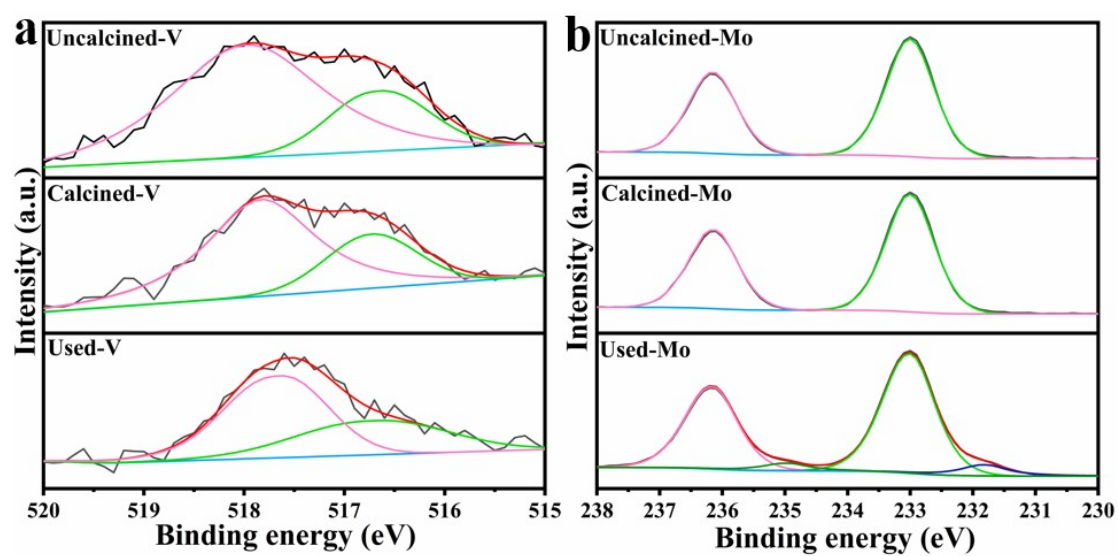

Fig. S6. (a) V 2p<sub>3/2</sub> and (b) Mo 3d XPS spectra of the uncalcined, calcined and used CsPAV.

**Table S1.** Surface analysis results for the CsPAV and PAMAM-CsPAV.

| Samples     |            | V 2p <sub>3/2</sub><br>V <sup>4+</sup> /V <sup>5+</sup> | Mo 3d<br>Mo <sup>5+</sup> /Mo <sup>6+</sup> | N 1s/Mo 3p <sub>3/2</sub><br>NH <sub>4</sub> <sup>+</sup> /Mo <sup>6+</sup> |
|-------------|------------|---------------------------------------------------------|---------------------------------------------|-----------------------------------------------------------------------------|
| CsPAV       | Uncalcined | 516.62/571.87                                           | -/233.05, -/236.15                          | -/398.91                                                                    |
|             | Calcined   | 516.73/517.83                                           | -/233.05, -/236.15                          | -/398.92                                                                    |
|             | used       | 516.66/517.62                                           | 231.89/233.05,<br>235.06/236.16             | -/398.84                                                                    |
| CsPAV-PAMAM | Uncalcined | 516.68/517.75                                           | -/233.28, -/236.43                          | 402.31/398.90                                                               |
|             | Calcined   | 516.77/518.14                                           | -/233.28, -/236.43                          | 402.34/398.85                                                               |
|             | used       | 516.78/517.94                                           | 231.99/233.28,<br>235.14/236.43             | 402.32/398.89                                                               |

**Table S2.** Surface analysis results for the CsPAV and PAMAM-CsPAV.

| Samples     |            | Atomic ratio        | Molar ratio                      |                                                |                                    |
|-------------|------------|---------------------|----------------------------------|------------------------------------------------|------------------------------------|
|             |            | P/Mo/N/V            | V <sup>4+</sup> /V <sup>5+</sup> | NH <sub>4</sub> <sup>+</sup> /Mo <sup>6+</sup> | Mo <sup>5+</sup> /Mo <sup>6+</sup> |
| CsPAV       | Uncalcined | 2.42/13.65/-/0.89   | 0.31                             | -                                              | -                                  |
|             | Calcined   | 2.34/13.89/-/0.63   | 0.40                             | -                                              | -                                  |
|             | used       | 2.65/14.36/-/0.55   | 0.60                             | -                                              | 0.11                               |
| CsPAV-PAMMA | Uncalcined | 2.57/9.76/0.76/0.37 | 0.44                             | 0.038                                          | -                                  |
|             | Calcined   | 2.69/9.94/0.53/0.45 | 0.76                             | 0.065                                          | -                                  |
|             | used       | 2.61/9.35/0.41/0.43 | 1.96                             | 0.030                                          | 0.08                               |

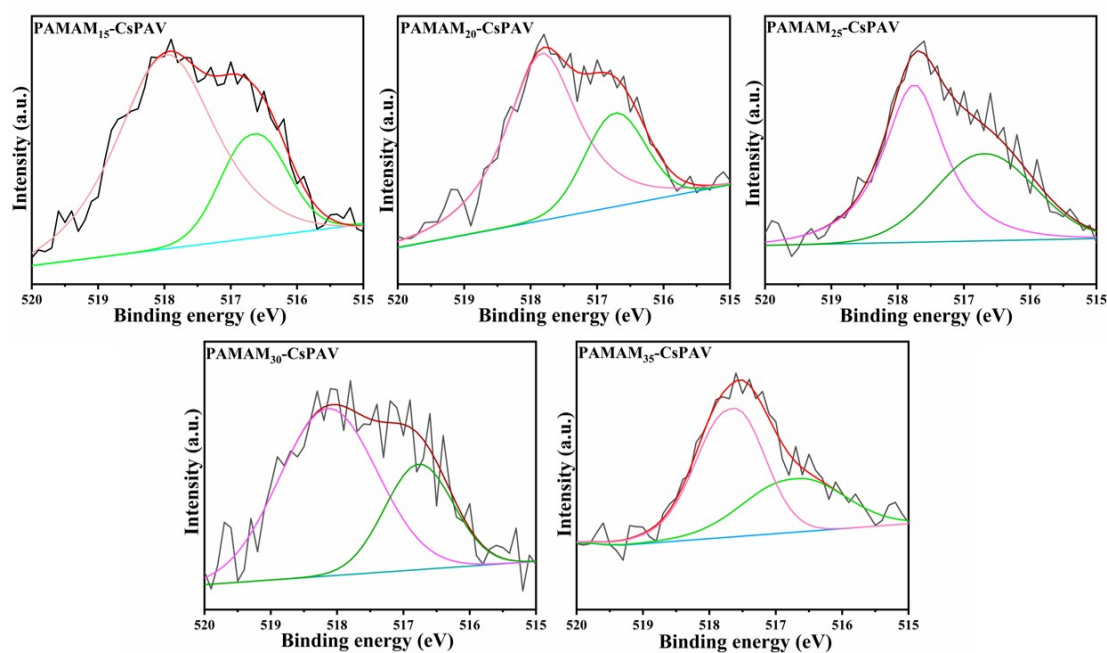**Fig. S7.** V 2p<sub>3/2</sub> XPS spectra of the calcined PAMAM<sub>n</sub>-CsPAV (n = 15-35%).

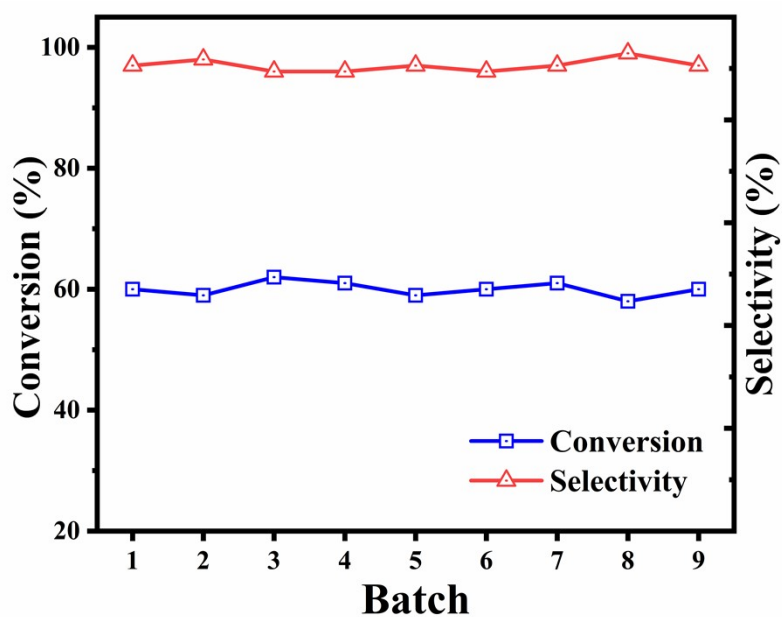

**Fig. S8.** Effect of different preparation batches on catalytic performance of calcined

**Table S3.** Evaluation results of catalytic performance of PAMAM<sub>n</sub>-CsPAV.

| n (%) | MAL Conversion (%) | Selectivity to MAA (%) | Yield of MAA (%) |
|-------|--------------------|------------------------|------------------|
| 15    | 56.3               | 79.7                   | 44.9             |
| 20    | 57.1               | 90.0                   | 52.3             |
| 25    | 60.4               | 97.2                   | 58.7             |
| 30    | 58.6               | 88.5                   | 51.9             |
| 35    | 56.9               | 72.4                   | 41.2             |

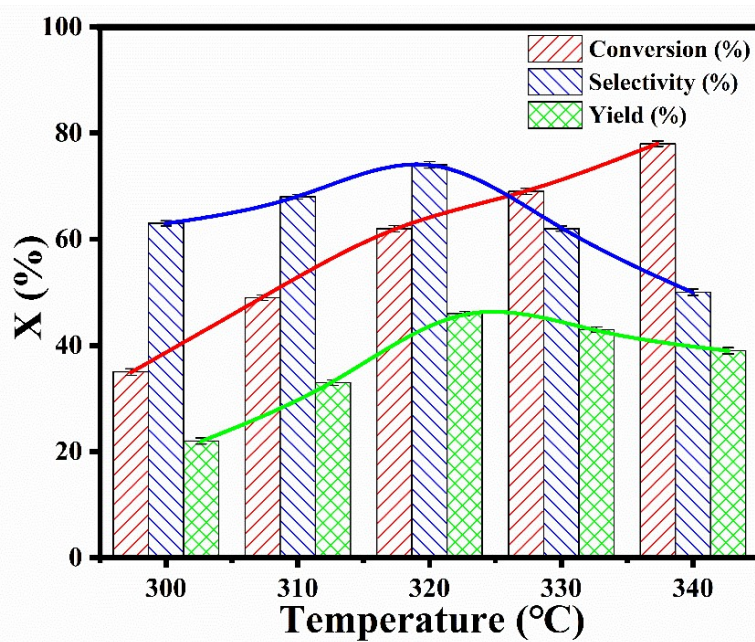

**Fig. S9.** Effects of reaction temperature on the performance of the calcined CsPAV.



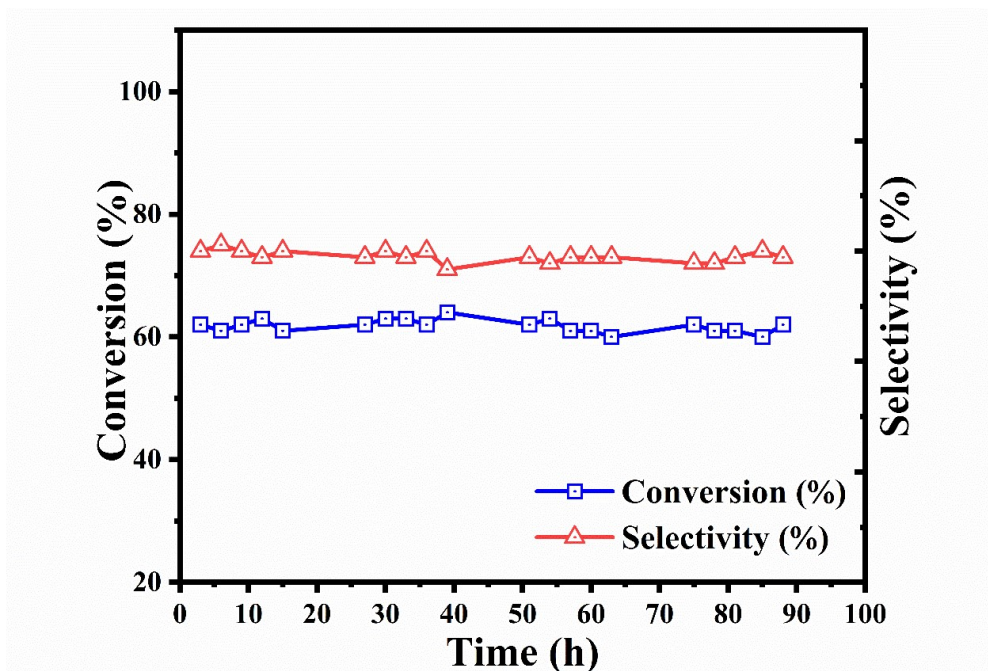

**Fig. S10.** The long-term performance of the calcined CsPAV (88 h).
